# Supplementary material for: Elastically driven intermittent microscopic dynamics in soft solids
Source: PubMed Central journal article supplement (PMC5482056; doi:10.1038/ncomms15846), 2017-06-21
Supplement: ncomms15846-s1.pdf [file ncomms15846-s1.pdf]

Type of file: PDF  
Size of file: 0 KB  
Title of file for HTML: Supplementary Information  
Description: Supplementary Figures

Type of file: MP4  
Size of file: 0 KB  
Title of file for HTML: Supplementary Movie 1  
Description: Animation showing the evolution of the particles displacement of the athermal network ( $k_{\text{B}}T/\epsilon = 0$ ) over a time window that covers a few rupture events. The color code is the same used in Fig.4 of the manuscript: most of the time nothing happens except after the rupture of a bond, which produces a long-range displacement field.

Type of file: MP4  
Size of file: 0 KB  
Title of file for HTML: Supplementary Movie 2  
Description: Animation showing the particles displacement over a time window that covers a few rupture events (same as in Supplementary movie1) at finite temperature  $k_{\text{B}}T/\epsilon = 10^{-3}$ . One can see that the particles move continuously but no significant change in the strain field after the bond breaking, because the consequences of the rupture are screened by the thermal fluctuations.

Type of file: PDF  
Size of file: 0 KB  
Title of file for HTML: Peer Review File  
Description:

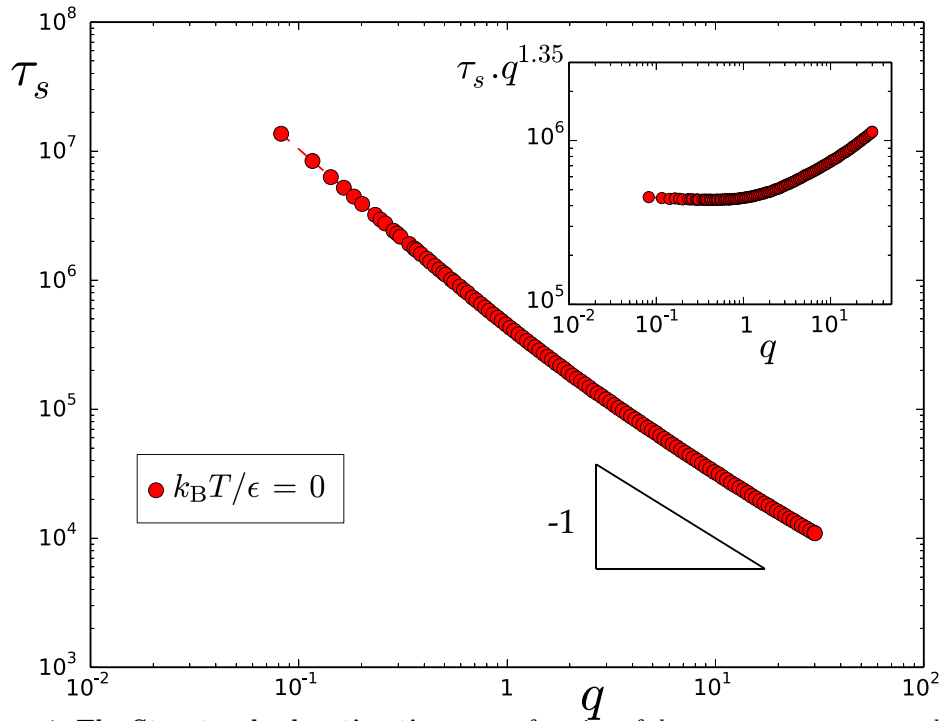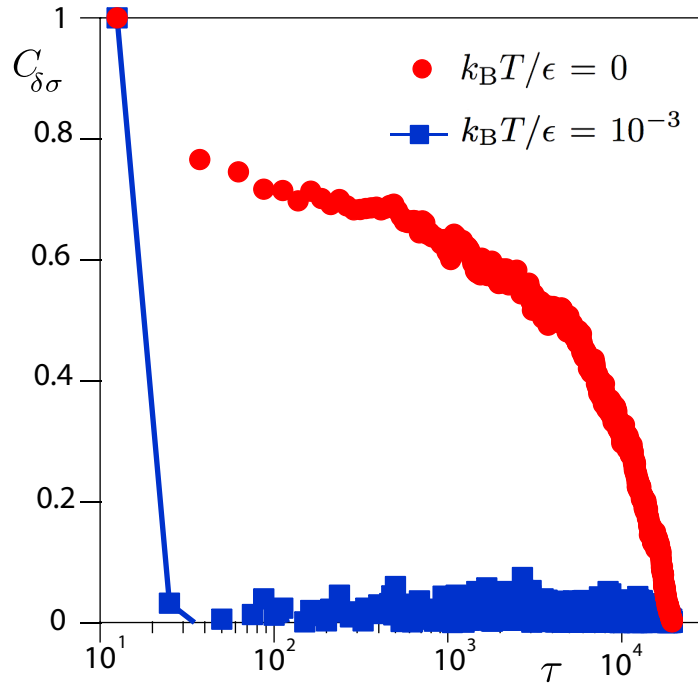

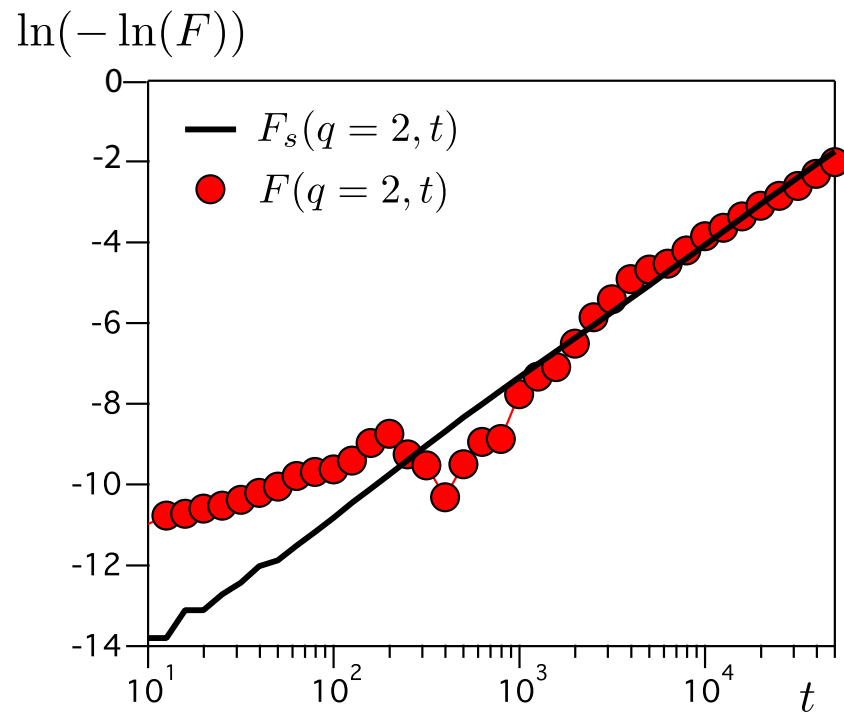

Supplementary Figure 3. **Coherent and incoherent scattering functions:** The decay of the coherent scattering function  $F(q, t)$  and the incoherent  $F_s(q, t)$  for the same value of the wave vector  $q = 2$  showing that the  $\beta$  exponent in the last decay is the same.
